# Supplementary material for: Menstrual health challenges in the workplace and consequences for women’s work and wellbeing: A cross-sectional survey in Mukono, Uganda
Source: PubMed Central journal article supplement (PMC10021399; doi:10.1371/journal.pgph.0000589), 2022-07-21
Supplement: pgph.0000589.s002.pdf [file pgph.0000589.s002.pdf]

**Supplementary Materials 2 – Sensitivity Analysis with participants working in markets.**

**MARKETS ONLY. Prevalence of menstrual health needs, bivariate and multivariable associations between menstrual health needs and work absenteeism and discomfort during menstruation.**

|                                                                     | Total % (mean) | Missed work n (%) / M (SD) | Did not miss work n (%) / M (SD) | PR (95%CI)              | aPR (95%CI)‡            | Would prefer to miss work n (%) | Would not prefer to miss n (%) | PR (95%CI)              | aPR (95%CI)‡            |
|---------------------------------------------------------------------|----------------|----------------------------|----------------------------------|-------------------------|-------------------------|---------------------------------|--------------------------------|-------------------------|-------------------------|
| Poverty                                                             | (4.68)         | 5.67 (3.98)                | 4.47 (3.70)                      | 1.06 (0.98-1.14)        | -                       | 5.17 (3.95)                     | 4.27 (3.58)                    | <b>1.03 (1.01-1.05)</b> | 0.99 (0.98-1.02)        |
| <b>Managing menses</b>                                              |                |                            |                                  |                         |                         |                                 |                                |                         |                         |
| Menstrual Practice Needs total score (0-3)                          | (0.55)         | 0.67 (0.49)                | 0.52 (0.39)                      | <b>1.78 (1.19-2.66)</b> | 1.26 (0.90-1.77)        | 0.63 (0.44)                     | 0.48 (0.37)                    | <b>1.55 (1.28-1.87)</b> | <b>1.36 (1.17-1.59)</b> |
| Few unmet needs                                                     | 54.7           | 36 (15.1)                  | 202 (84.9)                       |                         |                         | 98 (41.2)                       | 14 (58.8)                      |                         |                         |
| Some unmet needs                                                    | 42.8           | 32 (17.3)                  | 153 (82.7)                       |                         |                         | 94 (50.6)                       | 92 (49.5)                      |                         |                         |
| Many unmet needs                                                    | 2.5            | 4 (36.4)                   | 7 (63.6)                         |                         |                         | 7 (63.6)                        | 4 (36.4)                       |                         |                         |
| Uses improvised materials at work                                   | 23.6           | 24 (23.5)                  | 78 (76.5)                        | <b>1.48 (1.16-1.89)</b> | <b>1.38 (1.05-1.80)</b> | 55 (53.9)                       | 47 (46.1)                      | 1.21 (0.95-1.53)        |                         |
| Uses commercial materials at work                                   | 76.4           | 47 (14.2)                  | 284 (85.8)                       | 1.00                    | 1.00                    | 143 (43.1)                      | 189 (56.9)                     | 1.00                    |                         |
| <b>Pain</b>                                                         |                |                            |                                  |                         |                         |                                 |                                |                         |                         |
| Experiences pain                                                    | 80.2           | 67 (19.3)                  | 81 (94.2)                        | <b>2.92 (1.21-7.02)</b> | <b>2.88 (1.30-6.37)</b> | 171 (49.0)                      | 178 (51.0)                     | <b>1.47 (1.11-1.89)</b> | 1.39 (0.99-1.94)        |
| Does not experience pain                                            | 19.8           | 5 (5.8)                    | 281 (80.8)                       | 1.00                    | 1.00                    | 28 (32.6)                       | 58 (67.4)                      | 1.00                    | 1.00                    |
| Pain severity (1-10)                                                |                | 5.92 (2.96)                | 4.41 (3.37)                      | <b>1.11 (1.07-1.15)</b> | -                       | 5.27 (3.30)                     | 4.14 (3.30)                    | <b>1.05 (1.02-1.09)</b> | -                       |
| <b>Social support at work</b>                                       |                |                            |                                  |                         |                         |                                 |                                |                         |                         |
| Comfortable talking to someone                                      | 45.2           | 26 (13.3)                  | 170 (86.7)                       | 1.00                    |                         | 82 (41.6)                       | 115 (58.4)                     | 1.00                    | 1.00                    |
| Not comfortable talking to someone                                  | 54.8           | 46 (19.3)                  | 192 (80.7)                       | <b>1.40 (1.06-1.85)</b> | <b>1.49 (1.02-2.17)</b> | 117 (49.2)                      | 50.84 (121)                    | 1.18 (0.98-1.41)        | <b>1.15 (1.02-1.30)</b> |
| Has someone she could ask for help                                  | 40.8           | 34 (19.2)                  | 143 (80.8)                       | 1.00                    | -                       | 81 (45.5)                       | 97 (54.5)                      | 1.00                    | -                       |
| Does not have someone                                               | 59.2           | 38 (14.8)                  | 219 (85.2)                       | 0.79 (0.53-1.15)        | -                       | 118 (45.9)                      | 139 (54.1)                     | 1.01 (0.88-1.15)        | -                       |
| <b>Sociocultural environment: Attitudes &amp; norms</b>             |                |                            |                                  |                         |                         |                                 |                                |                         |                         |
| Attitude: Menstruation should be kept secret                        |                |                            |                                  |                         |                         |                                 |                                |                         |                         |
| Agree                                                               | 64.4           | 48 (17.2)                  | 231 (82.8)                       | 1.09 (0.60-1.98)        | -                       | 134 (48.0)                      | 145 (52.0)                     | 1.14 (0.97-1.33)        | 0.98 (0.86-1.11)        |
| Disagree                                                            | 35.6           | 24 (15.6)                  | 130 (84.4)                       | 1.00                    | -                       | 65 (41.9)                       | 90 (58.1)                      | 1.00                    | 1.00                    |
| Attitude: Women should avoid work during menstruation for hygiene   |                |                            |                                  |                         |                         |                                 |                                |                         |                         |
| Agree                                                               | 36.3           | 39 (24.8)                  | 118 (75.2)                       | <b>1.95 (1.36-2.80)</b> | 1.40 (0.88-2.23)        | 106 (67.1)                      | 52 (32.9)                      | <b>1.98 (1.67-2.34)</b> | <b>1.71 (1.44-2.02)</b> |
| Disagree                                                            | 63.7           | 33 (12.0)                  | 242 (88.0)                       | 1.00                    | 1.00                    | 92 (33.5)                       | 183 (66.6)                     | 1.00                    | 1.00                    |
| Injunctive norm: Women are expected to keep menstruation secret     |                |                            |                                  |                         |                         |                                 |                                |                         |                         |
| Agree                                                               | 75.6           | 58 (17.9)                  | 267 (82.2)                       | <b>1.45 (0.97-2.16)</b> | 1.04 (0.71-1.53)        | 154 (47.2)                      | 172 (52.8)                     | 1.21 (0.89-1.64)        | -                       |
| Disagree                                                            | 24.4           | 23 (12.4)                  | 92 (87.6)                        | 1.00                    | 1.00                    | 41 (39.1)                       | 64 (61.0)                      | 1.00                    |                         |
| Injunctive norm: Women are expected to stay home when menstruating  |                |                            |                                  |                         |                         |                                 |                                |                         |                         |
| Agree                                                               | 17.9           | 28 (36.4)                  | 49 (63.6)                        | <b>2.88 (2.10-3.95)</b> | <b>2.49 (1.59-3.88)</b> | 55 (70.5)                       | 23 (29.5)                      | <b>1.75 (1.44-2.14)</b> | <b>1.39 (1.09-1.78)</b> |
| Disagree                                                            | 82.1           | 42 (11.9)                  | 312 (88.1)                       | 1.00                    | 1.00                    | 141 (39.8)                      | 213 (60.2)                     | 1.00                    | 1.00                    |
| Most shoppers would avoid purchasing food from a menstruating women |                |                            |                                  |                         |                         |                                 |                                |                         |                         |
| Agree                                                               | 60.1           | 51 (19.7)                  | 208 (80.3)                       | <b>1.50 (1.04-2.19)</b> | 1.17 (0.77-1.77)        | 140 (53.9)                      | 120 (46.1)                     | 1.60 (0.99-2.58)        | <b>1.39 (1.07-1.80)</b> |
| Disagree                                                            | 39.9           | 21 (12.2)                  | 151 (87.8)                       | 1.00                    | 1.00                    | 57 (33.1)                       | 115 (66.9)                     | 1.00                    | 1.00                    |

PR: Prevalence Ratio. aPR: Adjusted prevalence ratio. CI: Confidence Interval. ‡ Confidence intervals using Kauer mann-Carroll correction were extreme due to the very small number of clusters (n=10), noted as problematic elsewhere,<sup>1</sup> thus CI's reported do not adjust for the small number of clusters

1. Thompson J, Hemming K, Forbes A, et al. Comparison of small-sample standard-error corrections for generalised estimating equations in stepped wedge cluster randomised trials with a binary outcome: A simulation study. *Statistical methods in medical research* 2021;30(2):425-39.

**MARKETS ONLY. Associations between reported menstrual health needs and wellbeing measured using the WHO-5**

| Predictor                                                                  | Model 1 (predictor with adjustment for age & poverty) |               | Model 2 (full multivariable model) |              |
|----------------------------------------------------------------------------|-------------------------------------------------------|---------------|------------------------------------|--------------|
|                                                                            | b (Std. Error)                                        | 95%CI         | b (Std. Error)                     | 95%CI        |
| Age                                                                        | <b>-0.50 (0.11)</b>                                   | -0.75, -0.24  | <b>-0.41 (0.14)</b>                | -0.72, -0.09 |
| Poverty                                                                    | <b>-1.98 (0.25)</b>                                   | -2.55, -1.41  | <b>-1.73 (0.27)</b>                | -2.33, -1.12 |
| <b>Managing menses</b>                                                     |                                                       |               |                                    |              |
| Menstrual Practice Needs total score                                       | <b>-7.67 (1.41)</b>                                   | -10.85, -4.48 | <b>-6.55 (1.45)</b>                | -9.84, -3.26 |
| Uses improvised materials at work (yes)                                    | 2.66 (1.53)                                           | -0.80, 6.13   | -                                  |              |
| <b>Pain</b>                                                                |                                                       |               |                                    |              |
| Experiences pain (yes)                                                     | <b>-3.63 (2.13)</b>                                   | -8.44, 1.19   | -                                  |              |
| Pain severity (1-10)                                                       | -0.52 (0.31)                                          | -1.23, 0.18   | -                                  |              |
| <b>Social support at work</b>                                              |                                                       |               |                                    |              |
| Comfortable talking to someone (No)                                        | <b>-4.77 (1.68)</b>                                   | -8.57, -0.98  | <b>-5.22 (1.99)</b>                | -9.72, -0.71 |
| Has someone she could ask for help (No)                                    | -0.29 (2.00)                                          | -4.83, 4.25   | -                                  |              |
| <b>Attitudes &amp; norms</b>                                               |                                                       |               |                                    |              |
| Attitude: Menstruation should be kept secret (agree)                       | 3.95 (2.01)                                           | -0.60, 8.50   | 5.00 (2.40)                        | -0.43, 10.42 |
| Attitude: Women should avoid work during menstruation for hygiene (agree)  | <b>4.81 (2.05)</b>                                    | 0.18, 9.44    | 4.54 (2.39)                        | -0.86, 9.95  |
| Injunctive norm: Women are expected to keep menstruation secret (agree)    | -0.25 (2.18)                                          | -5.18, 4.68   | -                                  |              |
| Injunctive norm: Women are expected to stay home when menstruating (agree) | <b>4.35 (1.39)</b>                                    | 1.21, 7.50    | 2.37 (1.49)                        | -0.86, 9.95  |
| Most shoppers would avoid purchasing food from a menstruating woman        | -0.18 (2.25)                                          | -5.26, 4.91   | -                                  |              |
|                                                                            |                                                       |               |                                    |              |
| Intercept                                                                  |                                                       |               | 68.58 (1.49)                       |              |
| Adj R <sup>2</sup>                                                         |                                                       |               | 0.18                               |              |

b: regression coefficient. Std. Error: Robust standard error with cluster adjustment.
